# Supplementary material
Source: publisher site journal article supplement (https://www.kjim.org/upload/media/kjim-2020-195-suppl7.pdf)
Supplement: Supplementary file 1 [file kjim-2020-195-suppl7.pdf]

**Supplementary Table 7. Associations between pathologic diagnoses and ESKD development in complete cases of patients with clinical HT-N**

| Pathologic diagnosis | Patients with clinical HT-N <sup>a</sup><br>(n = 2,490) |         | Matched cohort with biopsy-proven HT-N or<br>non-HT-N (n = 86/164) |         |
|----------------------|---------------------------------------------------------|---------|--------------------------------------------------------------------|---------|
|                      | HR (95% CI)                                             | p value | HR (95% CI)                                                        | p value |
| Biopsy-proven HT-N   | 0.92 (0.53–1.60)                                        | 0.77    | 0.97 (0.51–1.84)                                                   | 0.92    |
| Non-HT-N             | 1.0 (reference)                                         | -       | 1.0 (reference)                                                    | -       |

HRs were adjusted with age, gender, period of renal biopsy, glomerular filtration rate, serum albumin, hemoglobin, urine protein-creatinine ratio, systolic blood pressure, and diastolic blood pressure. The biopsy-proven HT-N group represents patients with only HT-N as pathologic diagnosis. Mixed, HT-N combined with other pathologic diagnoses; non-HT-N, other pathologic diagnoses other than HT-N.

ESKD, end-stage kidney disease; HT-N, hypertensive nephrosclerosis; HR, hazard ratio; CI, confidence interval.

<sup>a</sup>The HR for the mixed group could not be estimated due to no events.
